# Supplementary material
Source: MDPI journal article supplement (https://www.mdpi.com/1999-4907/11/8/812)

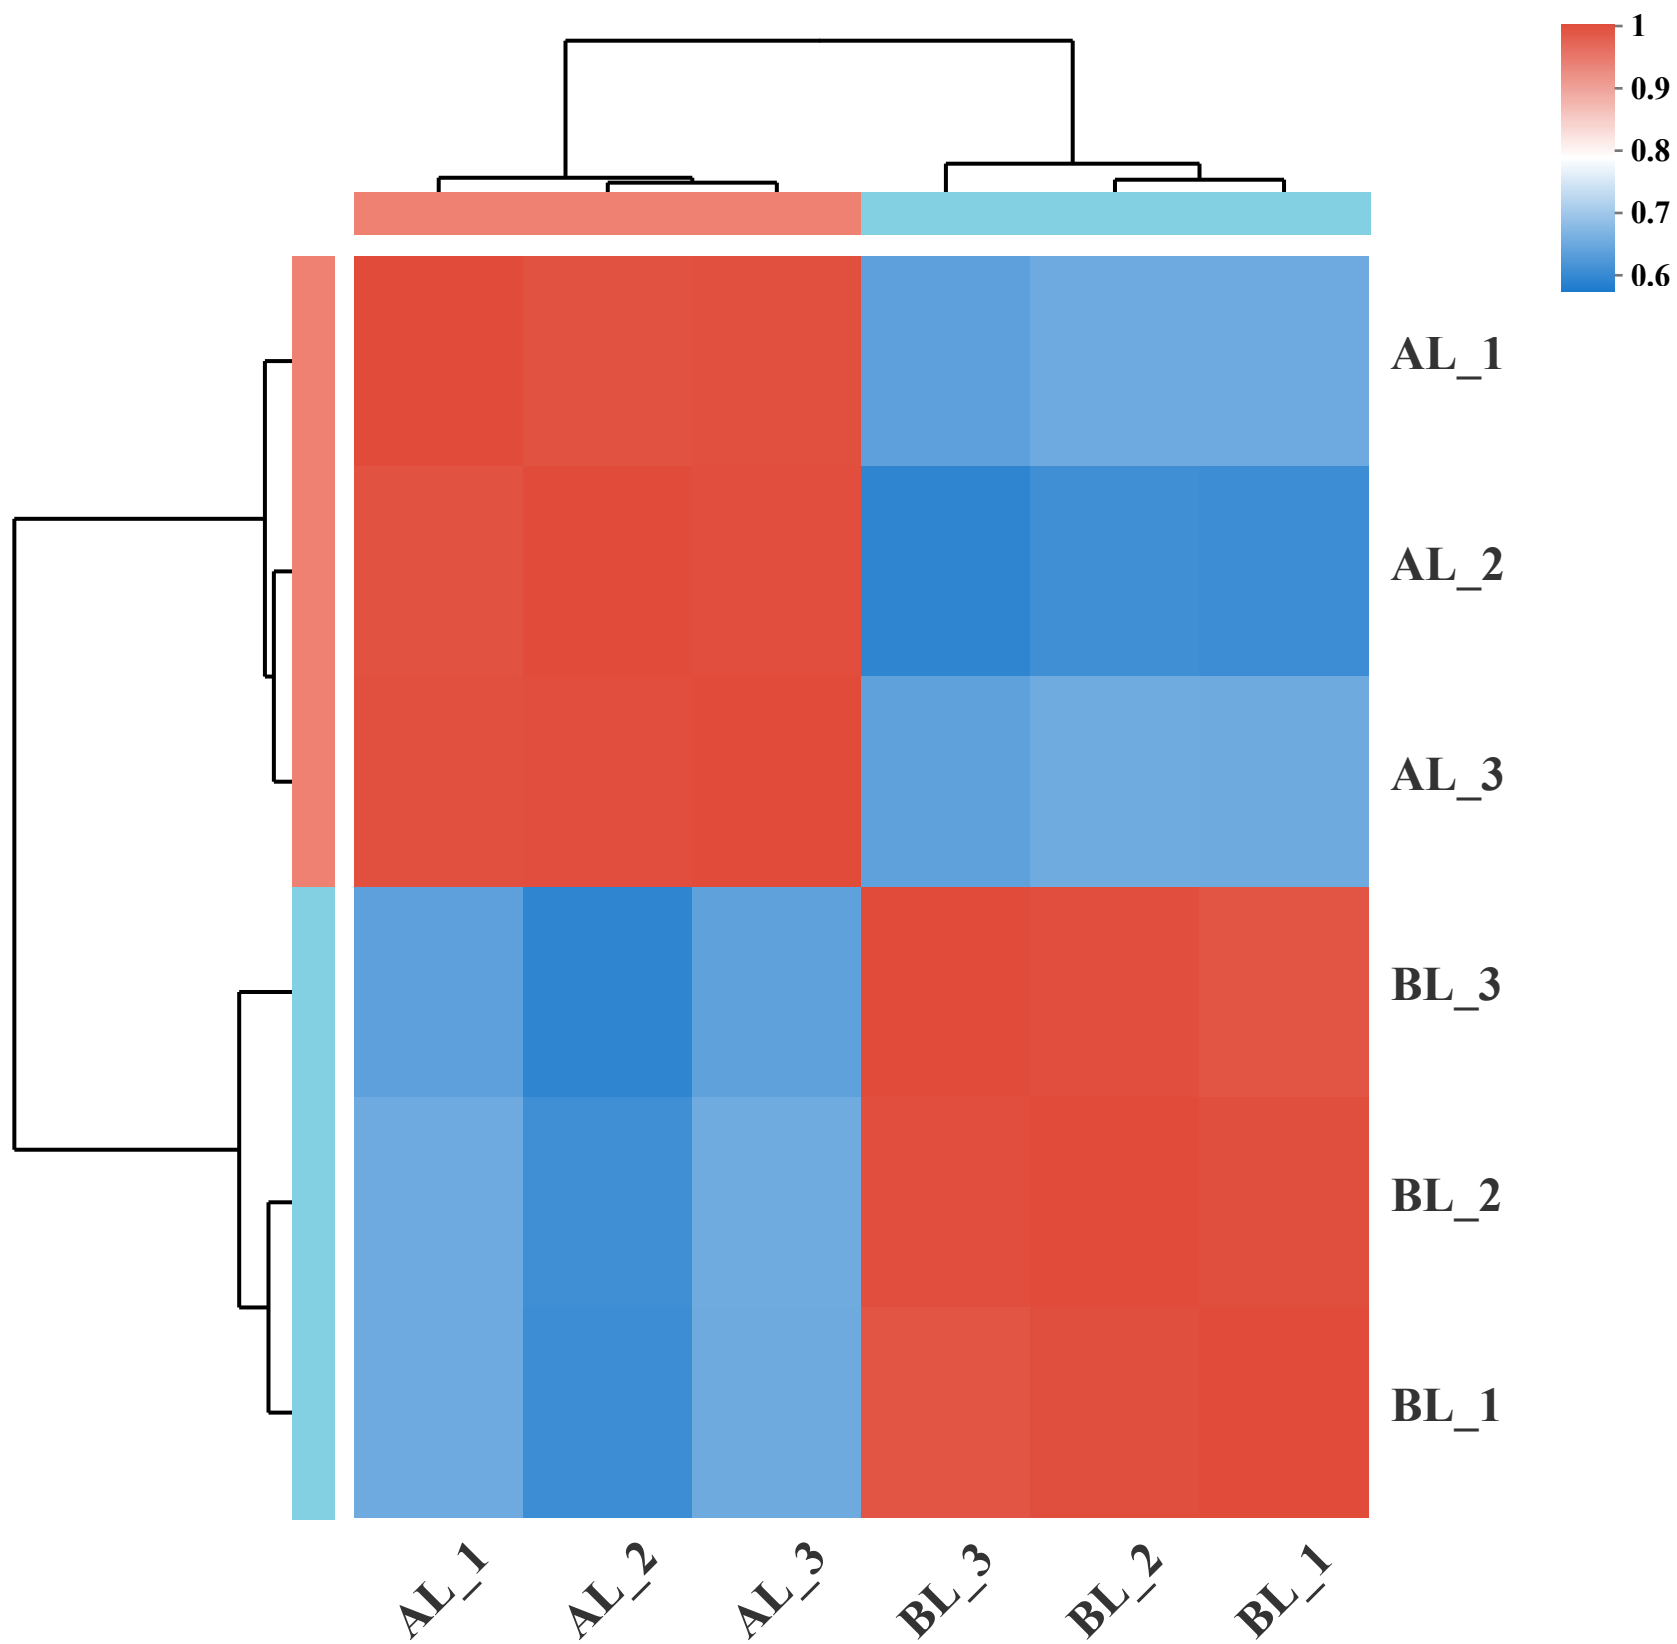

Supplement: s1 [file s1]

1 Y  
2 Y

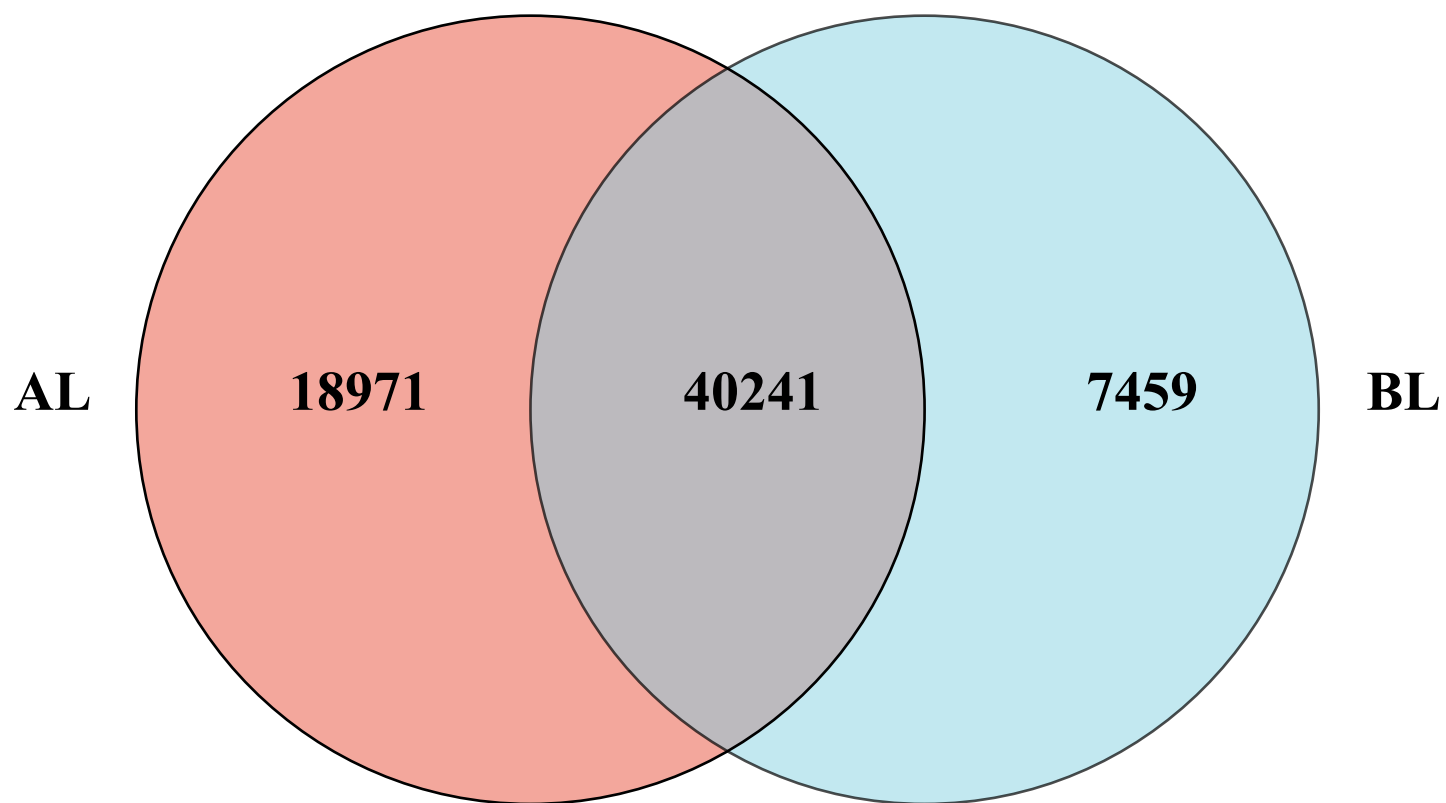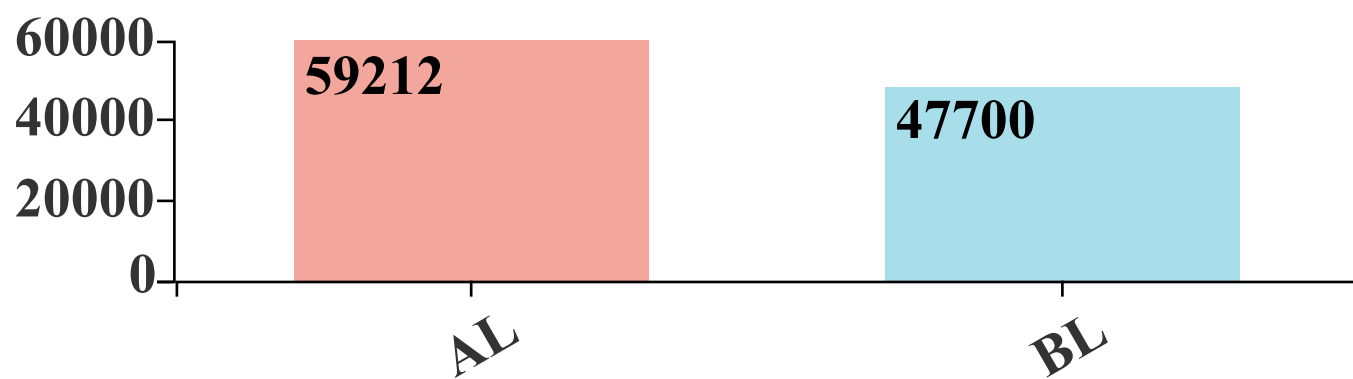

Supplement: s1 [file s1]

A

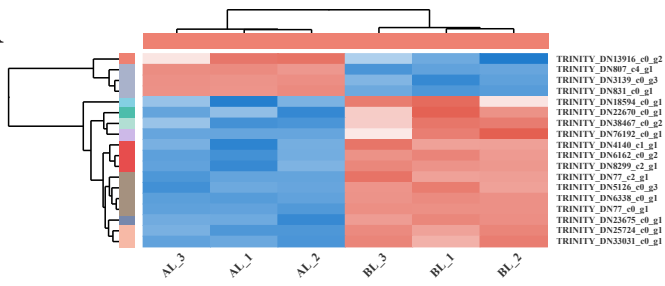

B

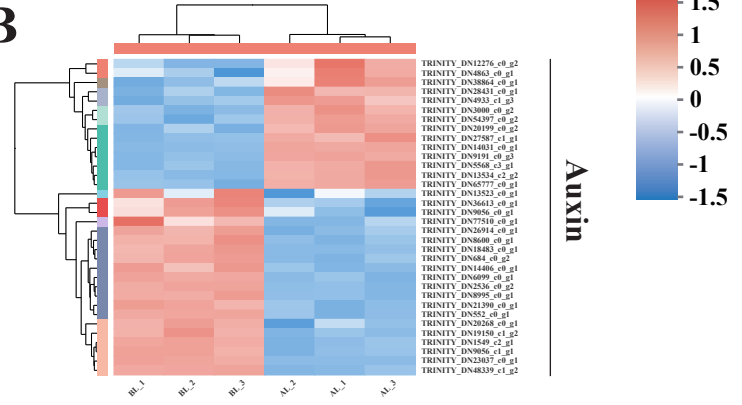

C

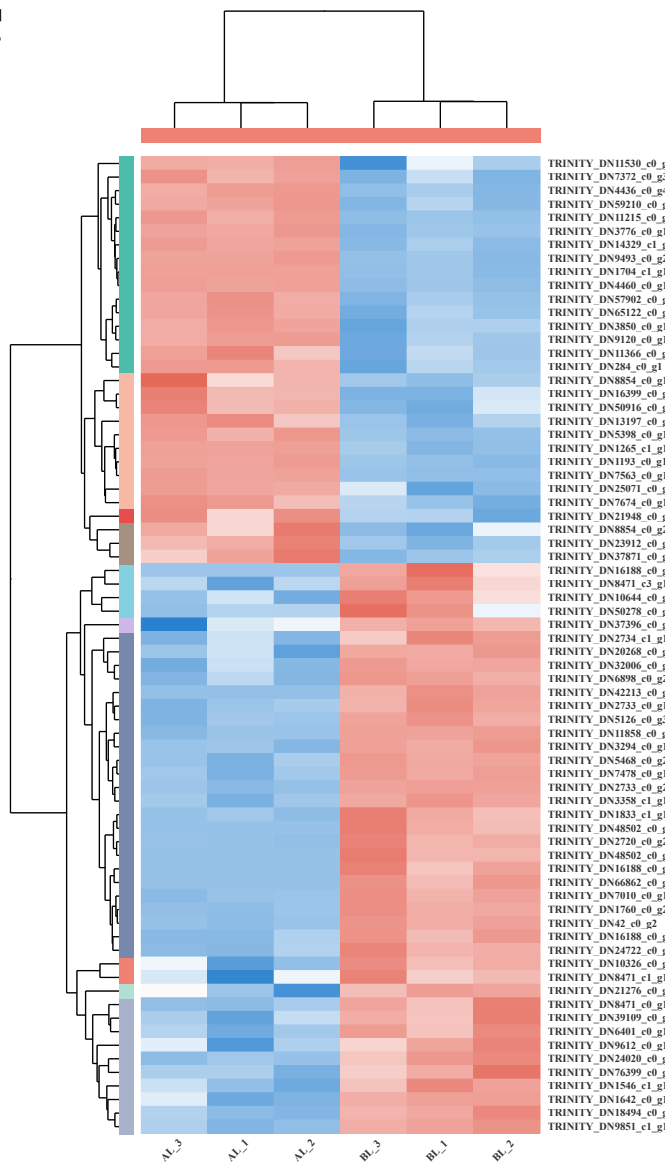

Auxin

CTK

ABA

Ethylene

JA

Supplement: s1 [file s1]

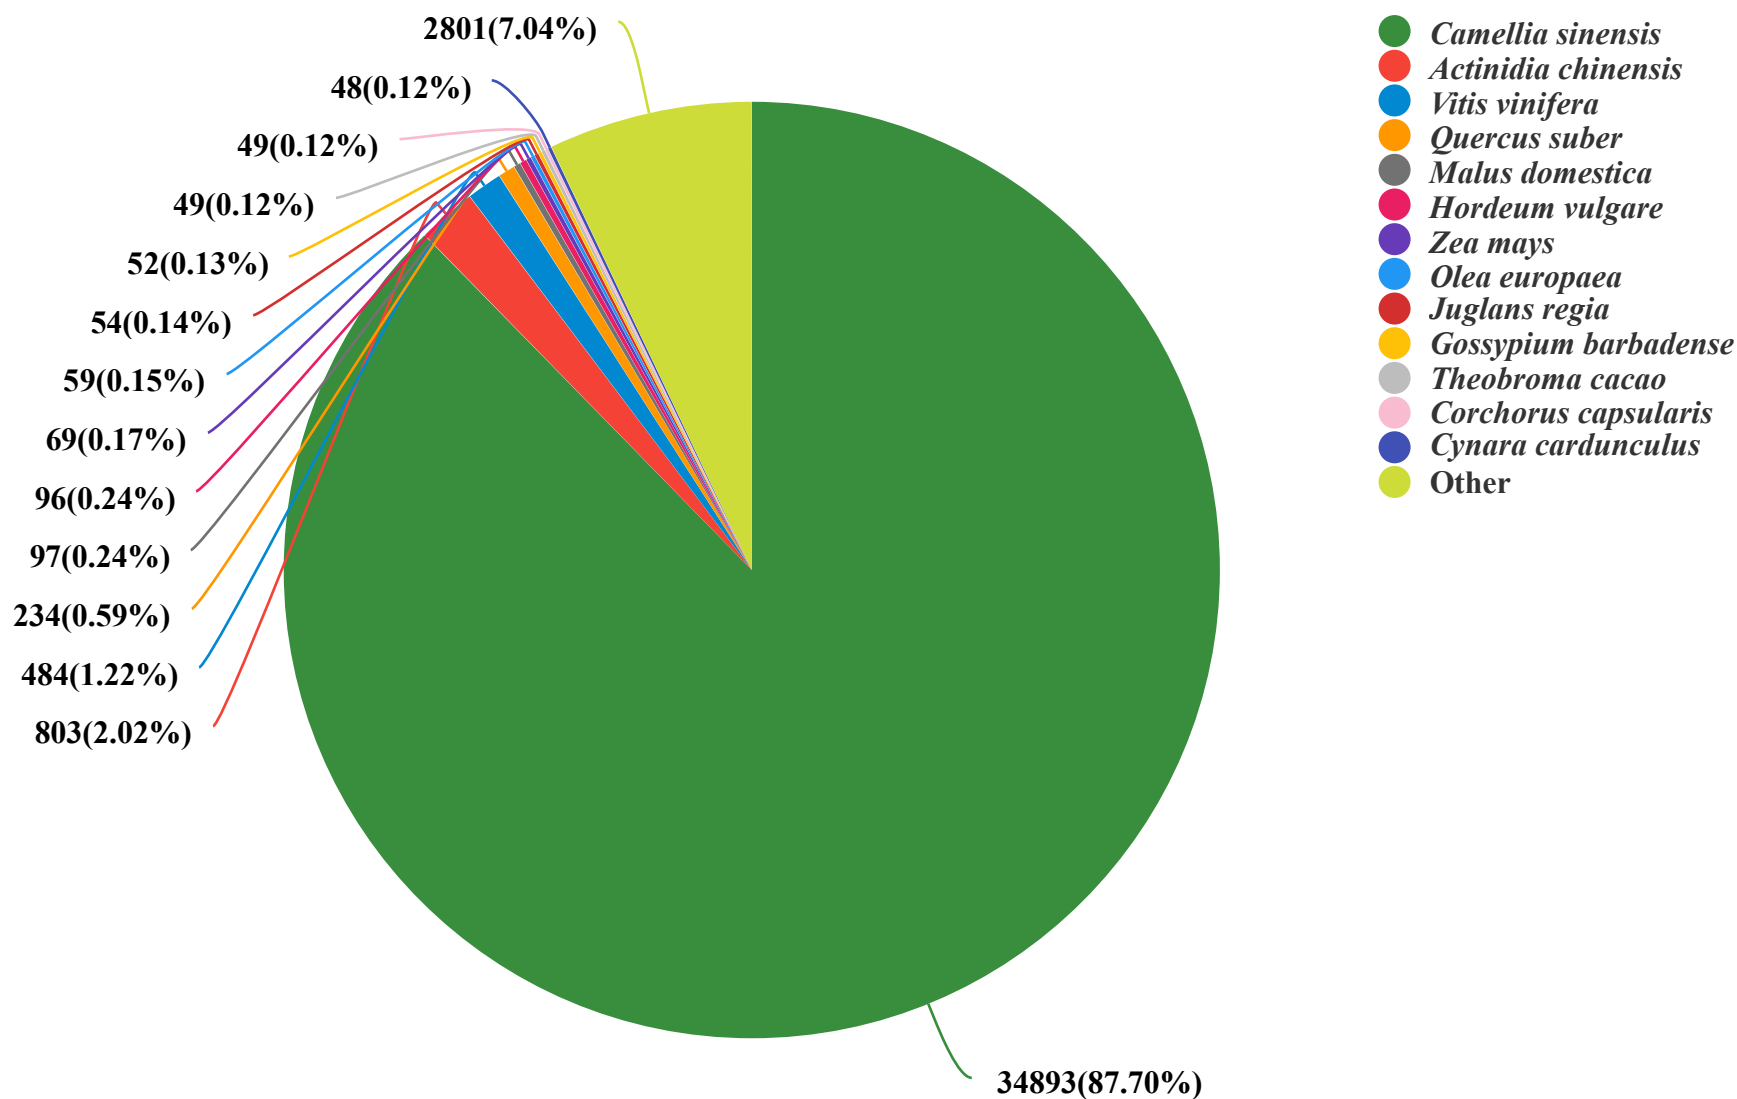

Supplement: s1 [file s1]
